# Supplementary material for: Optimizing PCR Detection of Zika Virus from Various Body Fluids
Source: PubMed Central journal article supplement (PMC6367632; doi:10.4269/ajtmh.18-0755), 2018-12-17
Supplement: tpmd180755.SD3.pdf [file tpmd180755.SD3.pdf]

SUPPLEMENTAL TABLE 3. Individual and average (expected) Ct values and respective concentrations of ZIKV RNA generated by repeated testing of the spiked reference control replicates

| Replicates | Set 1 |         | Set 2 |         | Set 3, run 1 |         | Set 3, run 2 |         | Average |         | SD  |        |
|------------|-------|---------|-------|---------|--------------|---------|--------------|---------|---------|---------|-----|--------|
|            | Ct    | cp/μl   | Ct    | cp/μl   | Ct           | cp/μl   | Ct           | cp/μl   | Ct      | cp/μl   | Ct  | cp/μl  |
| LO 1       | 33.8  | 1.8     | 33.9  | 1.8     | 33.3         | 1.5     | 33.9         | 1.7     | 33.9    | 1.5     | 0.4 | 0.3    |
| LO 2       | 34.9  | 0.8     | 33.9  | 1.7     | 33.7         | 1.1     | 33.8         | 1.8     |         |         |     |        |
| LO 3       | 34.1  | 1.4     | 34.2  | 1.4     | 33.3         | 1.5     | 34.2         | 1.4     |         |         |     |        |
| MED 1      | 28.5  | 65.0    | 28.2  | 91.8    | 27.7         | 78.9    | 28.1         | 94.3    | 28.2    | 81.1    | 0.3 | 8.8    |
| MED 2      | 28.3  | 77.4    | 28.2  | 92.6    | 27.6         | 79.3    | 28.3         | 84.4    |         |         |     |        |
| MED 3      | 28.4  | 71.3    | 28.4  | 83.8    | 27.7         | 78.0    | 28.4         | 76.7    |         |         |     |        |
| HI 1       | 21.1  | 11127.5 | 20.8  | 14988.9 | 20.7         | 17790.7 | 20.7         | 15865.1 | 20.6    | 16665.9 | 0.2 | 2869.9 |
| HI 2       | 20.8  | 13303.1 | 20.5  | 18488.1 | 20.7         | 17154.8 | 20.7         | 15506.6 |         |         |     |        |
| HI 3       | 20.1  | 21133.0 | 20.3  | 20277.0 | 20.6         | 18833.2 | 20.7         | 15523.1 |         |         |     |        |

SD = standard deviation; cp/μl = copies per microliter; LO = low spiking load; MED

= medium spiking load; HI = high spiking load.
