# Supplementary material for: Optimizing PCR Detection of Zika Virus from Various Body Fluids
Source: PubMed Central journal article supplement (PMC6367632; doi:10.4269/ajtmh.18-0755), 2018-12-17
Supplement: tpmd180755.SD4.pdf [file tpmd180755.SD4.pdf]

SUPPLEMENTAL TABLE 4. Individual Ct values and percent recovery of ZIKV RNA in various body fluid specimens using original and optimized extraction protocols

|                  | Rep 1 Ct | Rep 2 Ct | Rep 3 Ct | Expected Ct | #Rep within 1 Ct | % recovery | Average % recovery |
|------------------|----------|----------|----------|-------------|------------------|------------|--------------------|
| SR LO            | 34.8     | 34.1     | 34.4     | 33.9        | 3/3              | 82         | 75                 |
| SR MED           | 28.2     | 28.4     | 28.1     | 28.2        | 3/3              | 64         |                    |
| SR HI            | 21.1     | 21.1     | 21.1     | 20.6        | 3/3              | 79         |                    |
| WB LO            | 37.4     | 38.0     | 38.0     | 33.9        | 0/3              | 14         | 8                  |
| WB MED           | 32.2     | 31.7     | 33.3     | 28.2        | 0/3              | 9          |                    |
| WB HI            | 26.3     | 26.8     | 26.2     | 20.6        | 0/3              | 2          |                    |
| WB optimized LO  | 33.9     | 33.9     | 33.8     | 33.9        | 3/3              | 135        | 109                |
| WB optimized MED | 28.6     | 28.4     | 28.7     | 28.2        | 3/3              | 115        |                    |
| WB optimized HI  | 21.3     | 21.0     | 21.2     | 20.6        | 3/3              | 77         |                    |
| SS LO            | 33.7     | 33.8     | 33.5     | 33.9        | 3/3              | 112        | 107                |
| SS MED           | 27.7     | 27.4     | 27.6     | 28.2        | 3/3              | 131        |                    |
| SS HI            | 20.3     | 21.6     | 20.4     | 20.6        | 3/3              | 78         |                    |
| SS optimized LO  | 34.0     | 34.1     | 34.0     | 33.9        | 3/3              | 122        | 124                |
| SS optimized MED | 28.7     | 28.5     | 28.4     | 28.2        | 3/3              | 121        |                    |
| SS optimized HI  | 20.4     | 20.4     | 20.4     | 20.6        | 3/3              | 130        |                    |
| VS LO            | ND       | ND       | DC       | 33.9        | 0/3              | 0          | 2                  |
| VS MED           | 33.2     | 33.1     | 33.6     | 28.2        | 0/3              | 3          |                    |
| VS HI            | 25.2     | 24.6     | 27.4     | 20.6        | 0/3              | 3          |                    |
| VS optimized LO  | 34.6     | 34.3     | 33.7     | 33.9        | 3/3              | 110        | 111                |
| VS optimized MED | 28.5     | 28.3     | 28.5     | 28.2        | 3/3              | 101        |                    |
| VS optimized HI  | 20.5     | 20.4     | 20.1     | 20.6        | 3/3              | 123        |                    |
| BM LO            | 35.7     | 35.5     | 36.0     | 33.9        | 0/3              | 37         | 38                 |
| BM MED           | 29.6     | 29.4     | 29.6     | 28.2        | 0/3              | 42         |                    |
| BM HI            | 22.0     | 22.0     | 21.8     | 20.6        | 0/3              | 33         |                    |
| BM optimized LO  | 34.6     | 33.8     | 34.7     | 33.9        | 3/3              | 91         | 88                 |
| BM optimized MED | 28.4     | 28.1     | 28.0     | 28.2        | 3/3              | 104        |                    |
| BM optimized HI  | 21.1     | 20.8     | 20.7     | 20.6        | 3/3              | 70         |                    |
| SM LO            | 40.6     | ND       | ND       | 33.9        | 0/3              | 0          | 0                  |
| SM MED           | 36.5     | 35.7     | 36.9     | 28.2        | 0/3              | 0          |                    |
| SM HI            | 28.2     | 29.9     | 29.1     | 20.6        | 0/3              | 0          |                    |
| SM optimized LO  | 34.8     | 35.0     | 34.3     | 33.9        | 3/3*             | 40         | 29                 |
| SM optimized MED | 30.0     | 29.8     | 29.8     | 28.2        | 3/3*             | 21         |                    |
| SM optimized HI  | 22.4     | 22.4     | 23.2     | 20.6        | 2/3*             | 28         |                    |
| UR1 LO           | ND       | DC       | DC       | 33.9        | 0/3              | 0          | 3                  |
| UR1 MED          | 32.5     | 32.6     | 34.1     | 28.2        | 0/3              | 5          |                    |
| UR1 HI           | 25.4     | 26.1     | 25.7     | 20.6        | 0/3              | 3          |                    |
| UR1 optimized LO | 32.8     | 33.3     | 33.7     | 31.6**      | 2/3*             | 41         | 51                 |

|                   |      |      |      |        |      |    |    |
|-------------------|------|------|------|--------|------|----|----|
| UR1 optimized MED | 27.2 | 26.7 | 27.0 | 25.9** | 3/3* | 58 |    |
| UR1 optimized HI  | 19.4 | 19.5 | 19.2 | 18.3** | 3/3* | 55 |    |
| UR2 LO            | DC   | ND   | ND   | 33.9   | 0/3  | NC | NC |
| UR2 MED           | 33.9 | 33.4 | 34.0 | 28.2   | 0/3  | NC |    |
| UR2 HI            | 26.0 | 27.0 | 26.3 | 20.6   | 0/3  | NC |    |
| UR2 optimized LO  | 35.7 | 35.1 | 35.1 | 31.6** | 0/3* | NC | NC |
| UR2 optimized MED | 29.4 | 29.5 | 29.3 | 25.9** | 0/3* | NC |    |
| UR2 optimized HI  | 21.0 | 21.1 | 21.0 | 18.3** | 0/3* | NC |    |
| UR3 LO            | ND   | ND   | ND   | 33.9   | 0/3  | NC | NC |
| UR3 MED           | 38.1 | ND   | DC   | 28.2   | 0/3  | NC |    |
| UR3 HI            | 31.4 | 29.9 | 30.0 | 20.6   | 0/3  | NC |    |
| UR3 optimized LO  | 38.5 | DC   | 37.4 | 31.6** | 0/3* | NC | NC |
| UR3 optimized MED | 32.3 | 32.4 | 33.0 | 25.9** | 0/3* | NC |    |
| UR3 optimized HI  | 25.1 | 24.5 | 24.9 | 18.3** | 0/3* | NC |    |

\* = number of biological replicates within 2 Ct units from expected Ct; \*\* = expected Ct decreased by 2.3 due to 5-fold higher volume of spiked sample (1 ml vs. 0.2 ml); Rep = biological replicate; SR = serum; WB = whole blood; SS = saliva swabs; VS = vaginal secretions swabs; BM = breast milk; SM = semen; UR = urine; LO = low spiking load; MED = medium spiking load; HI = high spiking load; ND = not determined; DC = discordant; NC = not calculated.
